# Supplementary material for: Grape SnRK2.7 Positively Regulates Drought Tolerance in Transgenic Arabidopsis
Source: MDPI journal article supplement (doi:10.3390/ijms25084473), 2024-04-18
Supplement: s1 [file s1]

## Supplementary Figure legends

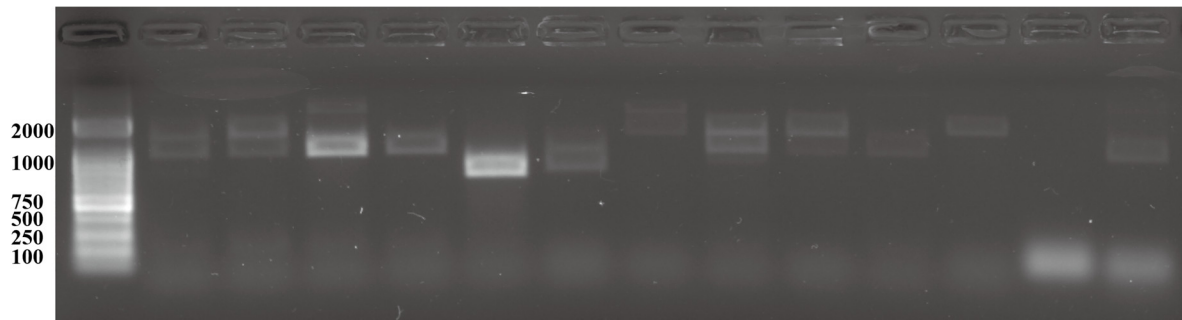

**Figure S1.** PCR strip of *Escherichia coli* liquid of some AD library vectors. The first column is the Marker band, and the rest of the columns are the bacteriophage P bands for some of the different genes obtained by hybridization from the AD library.

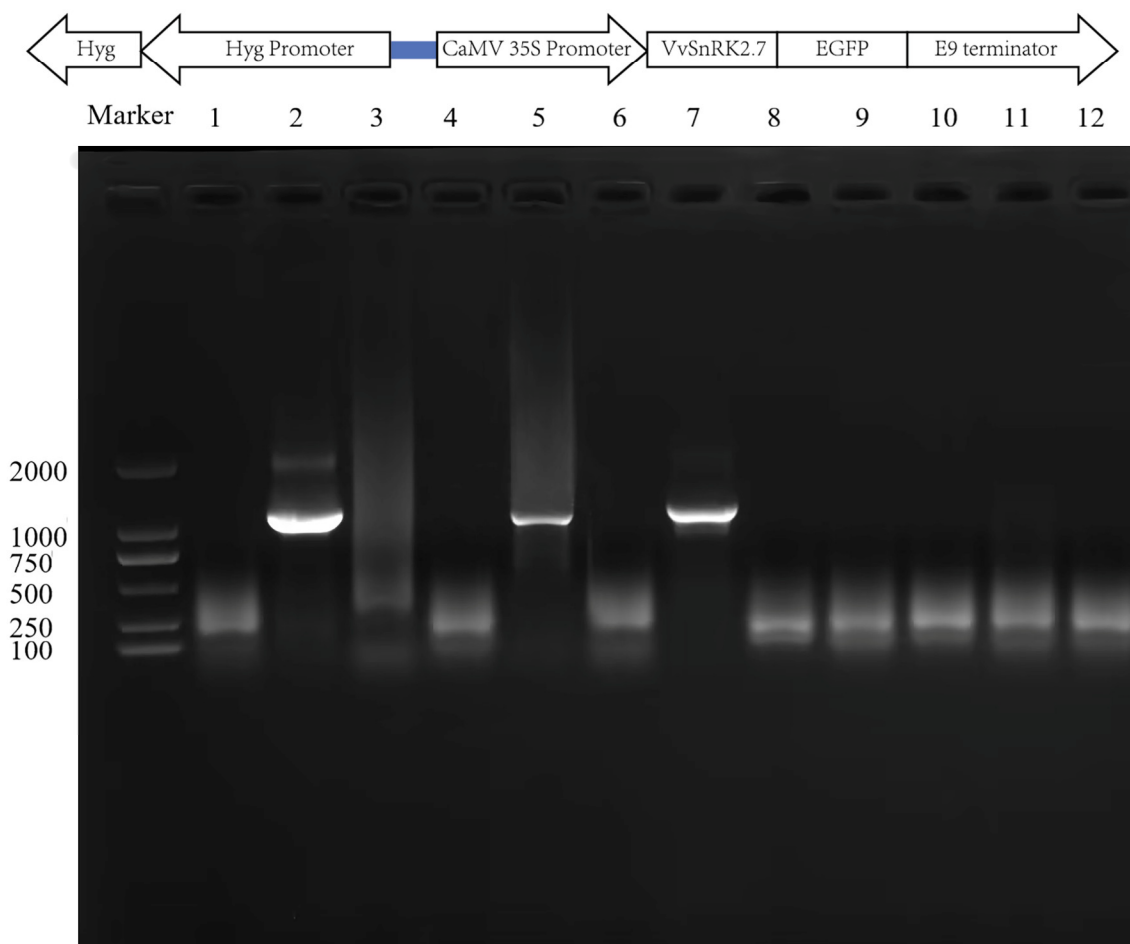

**Figure S2.** Identification of transgenic *Arabidopsis* plants. The first column is the Marker band and 1-12 are the transgenic strain bands, where 2, 5 and 7 are the positive plant bands.
